# Supplementary material
Source: publisher figshare collection journal article supplement (https://aacr.figshare.com/articles/dataset/_/23905292)

**Supplemental Figure 18. Concurrent Hypomethylation and Overexpression Probes.** The dot plot (top) displays the distribution of statistically significant CpG probes with difference in group mean methylation beta value, where the greater the value is a proxy for loss of methylation at the CpG probe. The probes are oriented by genomic locus across chromosome 1 with annotations for the midpoint of the recurrent gained regions on the 1q arm. The area graph (bottom) displays the ratio of probes that are significantly differentially methylated in any given 2MB window across chromosome 1. The highlighted region corresponds to the 1q arm.

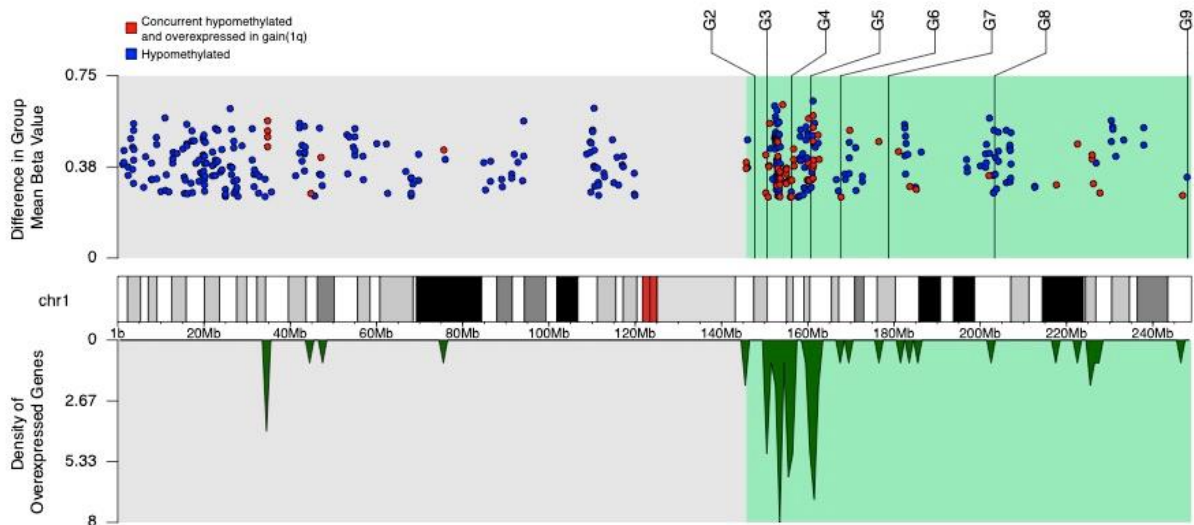

Supplement: Supplementary file 1 [file 41911475]
